# Supplementary material for: Bioprospecting Finds the Toughest Biological Material: Extraordinary Silk from a Giant Riverine Orb Spider
Source: PLoS One. 2010 Sep 16;5(9):e11234. doi: 10.1371/journal.pone.0011234 (PMC2939878; doi:10.1371/journal.pone.0011234)
Supplement: Table S1 — Biomechanical properties of spider major ampullate silk collected from web radii, ranked from toughest to least tough (table above). Biomechanical properties of some other natural fibers and of some high performance man made fibers (table below). (0.01 MB XLS) [file pone.0011234.s001.xls]

## Sheet: Sheet1
Biomechanical properties of spider major ampullate silk collected from web radii, ranked from toughest to least tough
Genus	species	Stiffness (Gpa)	Strength (Mpa)	Exstensibility (ln(mm/mm)	Toughness (MJ/m3)	Guild	Source
Mangora	gibberosa	5.5	1110	0.21	102	Orb	Sensenig et al. 2010
Neoscona	arabesca	7	1481	0.25	152	Orb	Sensenig et al. 2010
Cyclosa	conica	6.4	1210	0.31	154	Orb	Sensenig et al. 2010
Neoscona	crucifera	3.4	1483	0.3	154	Orb	Sensenig et al. 2010
Neoscona	domiciliorum	3.9	1469	0.31	160	Orb	Sensenig et al. 2010
Tetragnatha	versicolor	5.2	1674	0.26	161	Orb	Sensenig et al. 2010
Leucauge	venusta	5.6	1456	0.28	162	Orb	Sensenig et al. 2010
Argiope	trifasciata	5.2	1584	0.29	163	Orb	Sensenig et al. 2010
Eustala	sp.	8.2	1617	0.23	166	Orb	Sensenig et al. 2010
Zygiella	x-notata	8.6	1424	0.28	170	Orb	Sensenig et al. 2010
Araneus	marmoreus	6	1556	0.32	176	Orb	Sensenig et al. 2010
Argiope	aurantia	5.6	1702	0.29	180	Orb	Sensenig et al. 2010
Metepeira	labyrinthea	9.7	1682	0.24	180	Orb	Sensenig et al. 2010
Micrathena	gracilis	3.2	1401	0.39	181	Orb	Sensenig et al. 2010
Araneus	diadematus	3.6	1599	0.33	193	Orb	Sensenig et al. 2010
Araneus	trifolium	5	1722	0.31	193	Orb	Sensenig et al. 2010
Nuctenea	umbratica	7.4	1778	0.3	196	Orb	Sensenig et al. 2010
Larinioides	cornutus	7.7	1760	0.27	197	Orb	Sensenig et al. 2010
Nephila	clavipes	8.4	1725	0.28	206	Orb	Sensenig et al. 2010
Verrucosa	arenata	7.6	1842	0.31	228	Orb	Sensenig et al. 2010
Gasteracantha	cancriformis	5.2	1929	0.4	254	Orb	Sensenig et al. 2010
Average		6.11429	1581.14	0.293333	177.524
Caerostris	darwini	11.5	1850	0.33	271	Orb	This study
Biomechanical properties of some other natural fibers, and of some high performance man made fibers
Source	Fiber
Bovine ligament	elastin	0.001	2	1.5	1.6		Gosline e tal. 2004
Dragonfly tendon	resilin	0.002	3	1.9	4		Gosline e tal. 2004
cells and connective tissue	Fibronectin	<0.001	8	8.5			Klotzsch et al. 2009
Bird	muscle	0.7	53	0.19			Azizi et al. 2009
Mammal	bone	20	160	0.03	4		Gosline et al. 1999
Mammal tendon	collagen	1.2	120	0.13	6		Gosline e tal. 2004
Embioptera	silk	2	129	0.08	8		Collin et al. 2009	Approximate values estimated from graph, average of poorest performing silk among 6 taxa tested
Embioptera	silk	5.5	169	0.38	17		Collin et al. 2009	Approximate values estimated from graph, average of best performing silk among 6 taxa tested
Mussel	byssus	0.87	75	1.1	45		Gosline e tal. 2004
Mammal	wool	0.5	200	0.05	60		Gosline et al. 1999
Bomyx mori	silk		600	0.18	70		Hakimi et al. 2007
Spider	viscid silk	0.003	500	2.7	150		Gosline e tal. 2004
Man made	high-tensile steel	200	1500	0.01	6		Gosline e tal. 2004
Man made	carbon fibre	300	4000	0.01	25		Gosline e tal. 2004
Man made	Kevlar	130	3600	0.03	50		Gosline e tal. 2004
Enhanced silk	Metal infuses spider silk	88	4600	0.71	1493		Lee et al. 2009	Maximal values among several treatement methods
